# Supplementary material for: Diet Can Impact Microbiota Composition in Children With Autism Spectrum Disorder
Source: Front Neurosci. 2018 Jul 31;12:515. doi: 10.3389/fnins.2018.00515 (PMC6079226; doi:10.3389/fnins.2018.00515)
Supplement: Supplementary file 2 [file Data_Sheet_2.xlsx]

## Sheet: ASD
Supplemental Table 4 a. Correlations between Nutrients and Food groups and microbiota in children with ASD.
Nutrient Intake
Energy	Slackia	Bacteroidales	Butyricimonas	Megamonas	RF32	Akkermansia	Verrucomicrobia
𝞺	0.37092	0.43054	-0.40307	0.39241	-0.4162	-0.44821	-0.44821
p-value	0.0621	0.0281	0.0412	0.0474	0.0344	0.0217	0.0217
Total Fat	Bacteroidales	Alistipes	Dialister
𝞺	0.3391	-0.34308	0.34701
p-value	0.0901	0.0862	0.0824
Total Carbohydrate	Slackia	Bacteroidales	Parabacteroides	Dialister	Megamonas	Phascolarctobacterium	Coprobacillus	RF32	Enterobacteriaceae	Akkermansia	Verrucomicrobia
𝞺	0.34525	0.33746	0.36137	0.44205	0.33698	-0.37804	-0.37948	-0.42232	-0.35356	-0.46051	-0.46051
p-value	0.0841	0.0918	0.0697	0.0238	0.0923	0.0569	0.0559	0.0316	0.0764	0.0179	0.0179
Total Protein	Bacteroidales	Barnesiellaceae	Butyricimonas	Staphylococcus	Lachnospiraceae	Coprococcus	Peptococcus	Pep_Clostridium	RF32
𝞺	0.53776	-0.34632	-0.39782	-0.40691	-0.34085	-0.50906	0.5149	0.54349	-0.42582
p-value	0.0046	0.0831	0.0442	0.0391	0.0884	0.0079	0.0071	0.0041	0.0301
Starch	Bacteroidales	Odoribacter	Lactococcus	SMB53	Ruminococcaceae	Anaerotruncus	Faecalibacterium	Coprobacillus	RF39	Akkermansia	Tenericutes	Verrucomicrobia
𝞺	0.34454	-0.33972	0.35728	0.42564	0.34838	-0.44646	0.36342	-0.39027	0.39723	-0.48513	0.39723	-0.48513
p-value	0.0848	0.0895	0.0732	0.0302	0.0811	0.0222	0.068	0.0487	0.0445	0.012	0.0445	0.012
Total Dietary Fiber	Bacteroidales	Parabacteroides	Staphylococcus	Blautia	Coprococcus	Dorea	Oscillospira	Dialister	Megamonas	Phascolarctobacterium	RF32	Bilophila	Enterobacteriaceae
𝞺	0.38264	0.34017	-0.45307	-0.44889	-0.42085	-0.33402	0.34291	0.35043	0.34861	-0.35067	-0.38469	-0.37524	-0.38639
p-value	0.0537	0.0891	0.0201	0.0214	0.0323	0.0954	0.0864	0.0792	0.0809	0.079	0.0523	0.0589	0.0512
Soluble Dietary Fiber	Bacteroidales	Odoribacter	Dialister	Megamonas	Phascolarctobacterium	Erysipelotrichaceae	Catenibacterium	Coprobacillus	RF32	Bilophila	Akkermansia	Verrucomicrobia
𝞺	0.36958	-0.39925	0.37709	0.47314	-0.39925	-0.36479	0.41826	-0.43231	-0.35318	-0.35873	-0.36615	-0.36615
p-value	0.0631	0.0433	0.0576	0.0146	0.0433	0.0669	0.0335	0.0274	0.0768	0.0719	0.0658	0.0658
Insoluble Dietary Fiber	Bifidobacterium	Parabacteroides	Staphylococcus	Clostridiales	Lachnospiraceae	Blautia	Coprococcus	Dorea	Oscillospira	RF32	Bilophila	Enterobacteriaceae	Actinobacteria	Bacteroidetes
𝞺	-0.43453	0.33265	-0.61994	-0.39692	-0.35316	-0.45504	-0.55419	-0.41402	0.38872	-0.39344	-0.40035	-0.36211	-0.43726	0.33744
p-value	0.0265	0.0968	0.0007	0.0447	0.0768	0.0195	0.0033	0.0355	0.0497	0.0468	0.0427	0.0691	0.0255	0.0918
Pectins	Bacteroides	Parabacteroides	Staphylococcus	Lactococcus	Clostridiaceae_family	twod06	SMB53	Blautia	Lachnospira	Mogibacteriaceae	Erysipelotrichaceae_Eubacterium	RF32	Actinobacteria	Bacteroidetes
𝞺	0.35863	0.45299	-0.42469	-0.33795	-0.35248	-0.52865	-0.3853	-0.39829	0.4947	-0.45463	-0.44957	-0.47747	-0.34017	0.3894
p-value	0.072	0.0201	0.0306	0.0913	0.0774	0.0055	0.0519	0.0439	0.0102	0.0196	0.0212	0.0136	0.0891	0.0493
Total Grains	Lactococcus	Clostridiaceae_family	twod06	Clostridium	SMB53	Lachnospiraceae	Peptostreptococcaceae	Ruminococcaceae	Anaerotruncus	RF39	Akkermansia	Firmicutes	Tenericutes	Verrucomicrobia
𝞺	0.42149	0.42085	0.36604	0.34974	0.5453	0.34017	0.44889	0.40581	-0.49367	0.53936	-0.39897	0.36752	0.53936	-0.39897
p-value	0.032	0.0323	0.0659	0.0799	0.004	0.0891	0.0214	0.0397	0.0104	0.0045	0.0435	0.0647	0.0045	0.0435
Whole Grains	Bifidobacterium	Adlercreutzia	Slackia	Bacteroidales	Paraprevotellaceae__Prevotella	twod06	Anaerostipes	Lachnospiraceae_Ruminococcus	Peptococcus	Mogibacteriaceae	Catenibacterium	Coprobacillus	Campylobacter	Proteobacteria
𝞺	-0.35956	0.40911	0.43298	0.57081	0.39889	0.34913	0.38871	-0.45125	0.46297	0.42454	0.41485	-0.38942	-0.45923	-0.37393
p-value	0.0712	0.038	0.0271	0.0023	0.0435	0.0804	0.0497	0.0207	0.0172	0.0306	0.0351	0.0493	0.0183	0.0599
Refined Grains	Slackia	Parabacteroides	EtOH8	Lachnospiraceae	Butyrivibrio	Peptococcus	Mogibacteriaceae	Catenibacterium	Campylobacter	RF39	Akkermansia	Tenericutes	Verrucomicrobia
𝞺	-0.38543	-0.39829	-0.44723	0.55761	0.52316	-0.5296	-0.33243	-0.50696	0.46138	0.47223	-0.45162	0.47223	-0.45162
p-value	0.0518	0.0439	0.022	0.0031	0.0061	0.0054	0.0971	0.0082	0.0177	0.0149	0.0206	0.0149	0.0206
Food Groups Intake
Fruit	S247	Faecalibacterium
𝞺	0.33345	-0.3909
p-value	0.096	0.0483
Vegetables	Bifidobacterium	Bacteroides	SMB53	Faecalibacterium	Acidaminococcus	Holdemania	Actinobacteria	Bacteroidetes	Firmicutes
𝞺	-0.55514	0.41507	-0.36986	-0.375	0.34938	-0.46786	-0.44486	0.43253	-0.46404
p-value	0.0032	0.035	0.0629	0.0591	0.0802	0.0159	0.0228	0.0273	0.0169
Legumes	Bifidobacterium	Slackia	Bacteroides	Staphylococcus	Enterococcus	Leuconostoc	Lactococcus	Turicibacter	SMB53	Peptostreptococcaceae	Acidaminococcus	Holdemania	Actinobacteria	Bacteroidetes	Firmicutes
𝞺	-0.40294	-0.35377	0.55791	-0.41039	-0.382	-0.34628	-0.42068	-0.52079	-0.54962	-0.4224	0.35982	-0.58225	-0.5489	0.48979	-0.43609
p-value	0.0413	0.0762	0.0031	0.0373	0.0541	0.0831	0.0324	0.0064	0.0036	0.0316	0.071	0.0018	0.0037	0.0111	0.0259
Starchy Foods	Odoribacter	EtOH8	Lachnospiraceae	Lachnospiraceae_Ruminococcus	Megamonas	Mogibacteriaceae	Fusobacterium	Campylobacter	Akkermansia	Fusobacteria	Verrucomicrobia
𝞺	0.35108	0.37924	-0.3519	-0.49209	-0.38055	0.36593	-0.33912	-0.34481	0.45634	-0.33912	0.45634
p-value	0.0786	0.056	0.0779	0.0107	0.0551	0.066	0.0901	0.0845	0.0191	0.0901	0.0191
Starchy Vegetables	Bifidobacterium	S247	Lactobacillus	Ruminococcaceae	Enterobacteriaceae	Actinobacteria	Bacteroidetes
𝞺	-0.5631	0.33436	-0.34118	0.4081	-0.34986	-0.52504	0.33471
p-value	0.0027	0.095	0.0881	0.0385	0.0798	0.0059	0.0947
Juice	Prevotella	RF16	Alistipes	S247	Barnesiellaceae	Paraprevotella	Paraprevotellaceae__Prevotella	Enterobacteriaceae
𝞺	0.35335	0.40119	0.55769	0.33942	0.52671	0.4951	0.55472	-0.3548
p-value	0.0766	0.0422	0.0031	0.0898	0.0057	0.0101	0.0033	0.0753
Sweetened Beverages	Coriobacteriaceae	Adlercreutzia	Collinsella	Rikenellaceae	Odoribacter	Ruminococcus	Veillonella	Mogibacteriaceae	Erysipelotrichaceae	Bilophila	Haemophilus
𝞺	0.44242	0.44018	0.34096	0.49496	0.41661	0.52322	-0.6309	0.5272	0.43481	0.54096	-0.43102
p-value	0.0236	0.0244	0.0883	0.0101	0.0342	0.0061	0.0005	0.0056	0.0264	0.0043	0.0279
Grains	S247	Streptococcus	Dialister	Coprobacillus
𝞺	0.33575	-0.33713	0.44733	-0.41371
p-value	0.0936	0.0921	0.0219	0.0356
Refined Carbohydrates	Streptococcus	Holdemania
𝞺	-0.39062	-0.41896
p-value	0.0485	0.0331
Fried Food	Eggerthella	Alistipes	Turicibacter	Pep_Clostridium	Faecalibacterium	Acidaminococcus	Erysipelotrichaceae_Eubacterium	Sutterella	Enterobacteriaceae
𝞺	-0.40761	0.43451	-0.33467	-0.39679	0.43212	0.46496	-0.41003	0.39208	-0.43271
p-value	0.0387	0.0265	0.0947	0.0448	0.0275	0.0167	0.0375	0.0476	0.0273
Protein	Bacteroides	Prevotella	Rikenellaceae	Turicibacter	SMB53	Peptostreptococcaceae	Oscillospira	Acidaminococcus	Megamonas	Holdemania	Firmicutes
𝞺	0.50368	-0.36031	0.33738	-0.3609	-0.42669	-0.39418	-0.36305	0.54351	-0.47697	-0.38972	-0.3781
p-value	0.0087	0.0706	0.0919	0.0701	0.0297	0.0463	0.0683	0.0041	0.0137	0.0491	0.0568
Dairy	Megamonas
𝞺	0.40445
p-value	0.0404
Snacks	Coriobacteriaceae	Eggerthella	Bacteroides	Parabacteroides	Rikenellaceae	Alistipes	Barnesiellaceae	Coprococcus	Roseburia	Peptococcus	Pep_Clostridium	Faecalibacterium	Ruminococcus	Megasphaera	Bilophila	Firmicutes
𝞺	0.41252	-0.39952	-0.46998	0.33385	0.38071	0.60536	0.49461	0.39371	0.46725	-0.44247	-0.63506	0.34069	0.44604	0.34509	0.37354	0.39644
p-value	0.0362	0.0432	0.0154	0.0956	0.055	0.001	0.0102	0.0466	0.0161	0.0236	0.0005	0.0885	0.0224	0.0842	0.0601	0.045
Sweets	Bacteroides	Prevotella	RF16	Alistipes	Odoribacter	Blautia	Peptococcus	Ruminococcaceae	Faecalibacterium
𝞺	-0.35073	0.42258	0.3814	0.38068	0.34172	0.34628	-0.36145	-0.36236	0.33499
p-value	0.079	0.0315	0.0545	0.055	0.0875	0.0831	0.0696	0.0689	0.0944
Kids Meal	Coriobacteriaceae	Adlercreutzia	Collinsella	Paraprevotella	Coprococcus	Roseburia	Acidaminococcus	Megasphaera	Mogibacteriaceae	Erysipelotrichaceae	Haemophilus	Proteobacteria
𝞺	0.37892	0.41788	0.48845	0.35754	0.3772	0.49769	0.33427	0.39367	0.33525	0.36728	-0.42602	-0.54219
p-value	0.0563	0.0336	0.0113	0.0729	0.0575	0.0097	0.0951	0.0466	0.0941	0.0649	0.03	0.0042
Fish	Bacteroides	Turicibacter	Clostridium	Pseudoramibacter_Eubacterium	Lachnospira	Oscillospira	Fusobacterium	Fusobacteria
𝞺	0.34279	-0.34226	-0.34508	-0.34705	-0.35884	-0.33362	-0.3849	-0.3849
p-value	0.0865	0.087	0.0843	0.0824	0.0718	0.0958	0.0522	0.0453	0.0522
Condiments	Eggerthella	Megasphaera	Veillonella	Fusobacterium	RF32	Haemophilus	Fusobacteria
𝞺	-0.34187	0.47261	-0.36573	-0.47965	-0.36477	-0.39374	-0.47965
p-value	0.0874	0.0148	0.0662	0.0132	0.0669	0.0466	0.0132

## Sheet: CONT
Supplemental Table 4 b. Correlations between Nutrients and Food groups and microbiota in CONT children.
Energy	Odoribacter	Paraprevotella	Lactobacillus	Turicibacter	Peptococcus	Erysipelotrichaceae_Eubacterium	Sutterella	RF39	Proteobacteria	Tenericutes
𝞺	0.41535	0.36799	-0.3275	-0.37992	-0.35874	-0.44783	0.45851	-0.33475	0.40245	-0.33475
p-value	0.0225	0.0454	0.0773	0.0384	0.0516	0.0131	0.0108	0.0706	0.0275	0.0706
TotalFat	Adlercreutzia	Eggerthella	Paraprevotella	Clostridium	Anaerostipes	Ruminococcaceae	Phascolarctobacterium	Succiniclasticum	Erysipelotrichaceae_Eubacterium	Fusobacterium	RF39	Fusobacteria	Tenericutes
𝞺	0.35561	-0.32561	0.35977	0.34016	0.31461	0.31123	0.44096	0.34048	-0.30945	-0.33279	-0.4677	-0.33279	-0.4677
p-value	0.0538	0.0791	0.0508	0.0659	0.0904	0.0941	0.0147	0.0656	0.0961	0.0723	0.0092	0.0723	0.0092
TotalCarbohydrate	Collinsella	Bacteroides	RF16	Lactococcus	Anaerostipes	Dorea	Ruminococcaceae	Sutterella	Proteobacteria
𝞺	-0.37592	0.34105	-0.30754	-0.42417	-0.41985	-0.3366	-0.32681	0.40289	0.34016
p-value	0.0406	0.0651	0.0983	0.0195	0.0209	0.0689	0.078	0.0273	0.0659
TotalProtein	Coriobacteriaceae	Adlercreutzia	Collinsella	Prevotella	Alistipes	Barnesiellaceae	Clostridiales	SMB53	Coprococcus	Roseburia	Ruminococcaceae	Succiniclasticum	Coprobacillus	Erysipelotrichaceae_Eubacterium	Enterobacteriaceae	RF39	Tenericutes
𝞺	0.41537	0.37771	0.34565	-0.32592	0.31359	0.36418	0.41135	0.38776	0.32503	0.34105	0.35395	0.32168	-0.38042	-0.32013	0.37486	-0.40465	-0.40465
p-value	0.0225	0.0396	0.0614	0.0788	0.0915	0.0479	0.0239	0.0342	0.0797	0.0651	0.055	0.083	0.0381	0.0846	0.0412	0.0266	0.0266
Starch	Odoribacter	Lactobacillus	Lactococcus	Anaerostipes	Anaerotruncus	Succiniclasticum	RF32	Sutterella
𝞺	0.32814	-0.3738	-0.47693	-0.41317	-0.35875	-0.3439	-0.35129	0.36151
p-value	0.0767	0.0419	0.0077	0.0232	0.0516	0.0628	0.057	0.0497
TotalDietaryFiber	Turicibacter	Dorea	Lachnospira	Peptococcus	Anaerotruncus	Ruminococcus	Erysipelotrichaceae_Eubacterium	Sutterella	Proteobacteria
𝞺	-0.46717	-0.30634	0.45806	-0.33475	-0.51706	-0.4287	-0.61201	0.43181	0.39933
p-value	0.0092	0.0997	0.0706	0.0034	0.0181	0.0003	0.0172	0.0288
SolubleDietaryFiber	Turicibacter	Christensenellaceae	Anaerostipes	Anaerotruncus	Erysipelotrichaceae_Eubacterium	Sutterella	Proteobacteria
𝞺	-0.37814	-0.33819	-0.31082	-0.54248	-0.52836	0.31301	0.34861
p-value	0.0394	0.0676	0.0946	0.002	0.0027	0.0921	0.059
InsolubleDietaryFiber	Eggerthella	Turicibacter	Dorea	Lachnospira	Lachnospiraceae_Ruminococcus	Peptococcus	Anaerotruncus	Ruminococcus	Veillonella	Catenibacterium	Erysipelotrichaceae_Eubacterium	Sutterella	Haemophilus	Proteobacteria
𝞺	-0.12895	-0.43334	-0.3188	0.53415	-0.36596	-0.31694	-0.49075	-0.39444	-0.3155	-0.08898	-0.55862	0.48877	-0.03916	0.43226
p-value	0.4971	0.0167	0.086	0.0024	0.0467	0.0879	0.0059	0.031	0.0895	0.6401	0.0013	0.0061	0.8372	0.0171
Pectins	Alistipes	Turicibacter	Anaerostipes	Coprococcus	Anaerotruncus	Ruminococcus	Erysipelotrichaceae_Eubacterium
𝞺	0.30807	-0.41554	-0.34798	0.20311	-0.38239	-0.3228	-0.48165
p-value	0.0977	0.0224	0.0595	0.2817	0.037	0.0819	0.007
TotalGrains	Collinsella	Bacteroides	Lactococcus	Christensenellaceae	Lachnospiraceae	Blautia	Ruminococcaceae	RF32	Sutterella	Bilophila	Campylobacter	Enterobacteriaceae	Haemophilus	RF39	Akkermansia	Actinobacteria	Bacteroidetes	Firmicutes	Fusobacteria	Proteobacteria	Tenericutes	Verrucomicrobia
𝞺	-0.30781	0.31212	-0.43679	-0.35382	-0.06696	0.00823	-0.30323	-0.44965	0.36196	0.07932	0.22514	-0.20623	-0.04917	0.08737	0.06162	-0.25562	0.11146	-0.0634	0.15422	0.23737	0.08737	0.06162
p-value	0.098	0.0931	0.0158	0.0551	0.7252	0.9656	0.1033	0.0127	0.0494	0.6769	0.2316	0.2742	0.7964	0.6462	0.7463	0.1728	0.5576	0.7392	0.4158	0.2066	0.6462	0.7463
WholeGrains	Pseudoramibacter_Eubacterium	Anaerotruncus	Phascolarctobacterium
𝞺	0.31222	-0.34657	-0.32515
p-value	0.093	0.0606	0.0796
RefinedGrains	Lactobacillus	Faecalibacterium	RF32
𝞺	-0.39438	-0.00779	-0.44408
p-value	0.031	0.9674	0.014
Fruit	Pseudoramibacter_Eubacterium	Dialister
𝞺	-0.34812	0.40641
p-value	0.0594	0.0258
Vegetables	Bacteroides	Lactobacillus	EtOH8	Pseudoramibacter_Eubacterium	Catenibacterium	Erysipelotrichaceae_Eubacterium	Bacteroidetes
𝞺	0.31545	-0.46914	-0.33243	-0.52963	0.38703	-0.3228	0.31211
p-value	0.0895	0.0089	0.0727	0.0026	0.0346	0.0819	0.0931
Legumes, nuts and seeds	Bacteroides	Prevotella	RF16	Alistipes	EtOH8	Blautia	Lachnospira	Ruminococcus	Succiniclasticum	Veillonella	Haemophilus	Akkermansia	Verrucomicrobia
𝞺	0.47311	-0.45876	-0.32154	-0.31316	-0.55494	-0.31952	0.33297	-0.31055	0.35522	0.35453	0.44917	-0.40068	-0.40068
p-value	0.0083	0.0108	0.0832	0.092	0.0015	0.0852	0.0722	0.0949	0.0541	0.0546	0.0128	0.0282	0.0282
Starchy Foods	Coriobacteriaceae	Bacteroides	Alistipes	Paraprevotella	Paraprevotellaceae__Prevotella	Clostridiaceae_family	SMB53	Blautia	Peptostreptococcaceae	Erysipelotrichaceae	Catenibacterium	RF39	Bacteroidetes	Tenericutes
𝞺	-0.31291	0.49688	-0.42096	-0.41983	0.3218	-0.52194	-0.42682	-0.32498	-0.34557	-0.3223	0.36557	0.41469	0.48389	0.41469
p-value	0.0923	0.0052	0.0205	0.0209	0.0829	0.0031	0.0187	0.0797	0.0614	0.0824	0.047	0.0227	0.0067	0.0227
Starchy Vegetables	Alistipes	Lachnospiraceae	Oscillospira	Dialister
𝞺	0.07348	0.31222	-0.40665	-0.34295
p-value	0.6996	0.093	0.0257	0.0635
Juice	Rikenellaceae	Lachnospiraceae	Butyrivibrio	Faecalibacterium	Mogibacteriaceae
𝞺	0.39024	-0.31067	-0.36092	-0.41025	0.31137
p-value	0.033	0.0947	0.0501	0.0243	0.094
Sweetened Beverages	Alistipes	Oscillospira	Dialister	Phascolarctobacterium	Catenibacterium	RF32
𝞺	-0.43268	0.42156	0.33279	-0.37568	0.41473	-0.36398
p-value	0.0169	0.0203	0.0723	0.0408	0.0227	0.048
Grains	Coriobacteriaceae	Adlercreutzia	Collinsella	Rikenellaceae	Barnesiellaceae	Lactococcus	Streptococcus	Clostridiaceae_family	Sarcina	Lachnospiraceae	Roseburia	Ruminococcaceae	Succiniclasticum	Campylobacter	Actinobacteria	Firmicutes
𝞺	0.38119	0.49815	0.57236	0.3085	0.4164	0.32856	0.35028	0.30716	-0.41138	0.37284	0.41417	0.55535	0.43455	0.48088	0.34201	0.49682
p-value	0.0377	0.0051	0.0009	0.0972	0.0221	0.0763	0.0577	0.0987	0.0239	0.0424	0.0229	0.0014	0.0164	0.0071	0.0643	0.0052
Refined Crabohydrates	Slackia	Rikenellaceae	Anaerotruncus	Oscillospira	Dialister	Catenibacterium
𝞺	-0.5059	0.41924	0.33761	0.31437	0.31215	0.40303
p-value	0.0043	0.0211	0.0681	0.0907	0.0931	0.0272
Fried Food	Bifidobacterium	Bacteroides	Alistipes	Clostridiaceae_family	twod06	SMB53	Peptostreptococcaceae	Erysipelotrichaceae	Catenibacterium	RF32	Bilophila	Actinobacteria	Bacteroidetes	Firmicutes
𝞺	-0.31062	0.33015	-0.33602	-0.55244	-0.4171	-0.3935	-0.34559	-0.35308	0.41602	-0.38601	0.31455	-0.31993	0.41234	-0.35671
p-value	0.0948	0.0748	0.0695	0.0015	0.0218	0.0314	0.0614	0.0556	0.0222	0.0351	0.0905	0.0848	0.0236	0.053
Protein	Eggerthella	Lactobacillus	Pseudoramibacter_Eubacterium	Coprococcus	Oscillospira	Phascolarctobacterium	Enterobacteriaceae
𝞺	-0.31539	-0.31231	-0.40415	0.38807	-0.43282	0.37373	0.32484
p-value	0.0896	0.0929	0.0268	0.0341	0.0169	0.0419	0.0799
Dairy	Pseudoramibacter_Eubacterium	Anaerotruncus	Succiniclasticum
𝞺	-0.31139	0.35456	0.32343
p-value	0.0939	0.0546	0.0813
Snacks	Eggerthella	Bacteroides	Alistipes	Butyricimonas	Odoribacter	Clostridium	SMB53	Roseburia	Oscillospira	Dialister	Phascolarctobacterium	Erysipelotrichaceae_Eubacterium	RF32	Sutterella	Enterobacteriaceae	RF39	Tenericutes
𝞺	0.43346	0.32936	-0.48936	-0.35509	-0.33047	-0.33382	-0.33671	-0.37192	0.58786	0.52457	-0.59799	0.37125	-0.34803	0.32312	-0.54819	0.45955	0.45955
p-value	0.0167	0.0755	0.0061	0.0542	0.0745	0.0714	0.0688	0.043	0.0006	0.0029	0.0005	0.0434	0.0595	0.0816	0.0017	0.0106	0.0106
Sweets	Bacteroides	Alistipes	Enterococcus	Clostridiaceae_family	SMB53	Roseburia	Peptostreptococcaceae	Oscillospira	Dialister	Holdemania	RF32	Enterobacteriaceae	Actinobacteria	Bacteroidetes
𝞺	0.33982	-0.36176	-0.34279	-0.34027	-0.44709	-0.33471	-0.41705	0.41616	0.36586	-0.36291	-0.37766	-0.33849	-0.31401	0.35073
p-value	0.0662	0.0495	0.0637	0.0658	0.0132	0.0706	0.0219	0.0222	0.0468	0.0487	0.0396	0.0673	0.0911	0.0574
Kids Meal	Coriobacteriaceae	Bacteroides	Alistipes	Clostridiaceae_family	SMB53	Blautia	Peptostreptococcaceae	Erysipelotrichaceae	Catenibacterium	Holdemania	Actinobacteria	Bacteroidetes
𝞺	-0.4354	0.46654	-0.62988	-0.61574	-0.54203	-0.37969	-0.47656	-0.34183	0.33619	-0.39835	-0.38036	0.49326
p-value	0.0162	0.0094	0.0002	0.0003	0.002	0.0385	0.0078	0.0645	0.0693	0.0292	0.0381	0.0056
Fish	Enterococcus	twod06	Pseudoramibacter_Eubacterium	Lachnospiraceae_Ruminococcus	Peptococcus	Erysipelotrichaceae_Eubacterium	Enterobacteriaceae	Akkermansia	Bacteroidetes	Verrucomicrobia
𝞺	0.35493	-0.33236	-0.35044	-0.39205	-0.37105	-0.34331	0.31579	-0.31322	0.31625	-0.31322
p-value	0.0543	0.0727	0.0576	0.0321	0.0435	0.0633	0.0891	0.0919	0.0886	0.0919
Condiments	Adlercreutzia	Streptococcus	Dialister
𝞺	0.41407	0.33539	0.30878
p-value	0.0229	0.07	0.0969
